# Supplementary material for: Identification of responders to inhaled corticosteroids in a chronic obstructive pulmonary disease population using cluster analysis
Source: PubMed Central journal article supplement — BMJ Open. 2016 Jun 1;6(6):e010099. doi: 10.1136/bmjopen-2015-010099 (PMC4893846; doi:10.1136/bmjopen-2015-010099), 2016-06-01
Supplement: bmjopen-2015-010099supp.pdf [file bmjopen-2015-010099supp.pdf]

## Identification of responders to inhaled corticosteroids in a chronic obstructive pulmonary disease population using cluster analysis

David R Hinds,<sup>1</sup> Rachael L DiSantostefano,<sup>1\*</sup> Hoa V Le,<sup>1,2\*</sup> Steven Pascoe.<sup>3</sup>

<sup>1</sup>Worldwide Epidemiology, GlaxoSmithKline, Collegeville, Pennsylvania & RTP, North Carolina, USA

<sup>2</sup>PAREXEL International, Durham, North Carolina, USA

<sup>3</sup>Respiratory Medicines Development, GlaxoSmithKline, King of Prussia, Pennsylvania, USA

\*At the time that the analysis was conducted

### SUPPLEMENTARY MATERIAL

**Supplementary Table S1** Imbalances in baseline variables, as accounted for in the cluster analysis model

| Patient characteristics                                                                | Cluster 1<br>Eosinophils >2.4% |                        |         | Cluster 2<br>Eosinophils ≤2.4%, pack-years ≤46 |                        |         | Cluster 3<br>Eosinophils ≤2.4%, pack-years >46 |                        |         |
|----------------------------------------------------------------------------------------|--------------------------------|------------------------|---------|------------------------------------------------|------------------------|---------|------------------------------------------------|------------------------|---------|
|                                                                                        | VI (n=432)                     | FF/VI (n=1345)         | p value | VI (n=244)                                     | FF/VI (n=647)          | p value | VI (n=142)                                     | FF/VI (n=445)          | p value |
| Age, years                                                                             | 65 (58–71)                     | 65 (58–70)             | 0.7933  | 61.5 (54–70)                                   | 62 (55–69)             | 0.7681  | 65 (59–70)                                     | 65 (60–71)             | 0.7402  |
| Female sex                                                                             | 163 (37.7)                     | 530 (39.4)             | 0.5349  | 133 (54.5)                                     | 347 (53.6)             | 0.8150  | 48 (33.8)                                      | 164 (36.9)             | 0.5099  |
| Body mass index                                                                        | 25.95<br>(22.91–29.42)         | 26.05<br>(22.95–30.10) | 0.3185  | 26.39<br>(23.05–30.66)                         | 26.13<br>(22.94–29.55) | 0.4082  | 25.69<br>(23.23–29.81)                         | 26.59<br>(23.15–30.34) | 0.3637  |
| Hispanic or Latino                                                                     | 68 (15.7)                      | 230 (17.1)             | 0.5105  | 48 (19.7)                                      | 144 (22.3)             | 0.4028  | 32 (22.5)                                      | 62 (13.9)              | 0.0149  |
| Current smoker                                                                         | 178 (41.2)                     | 536 (39.9)             | 0.6179  | 125 (51.2)                                     | 318 (49.1)             | 0.5798  | 61 (43.0)                                      | 221 (49.7)             | 0.1638  |
| Number of pack-years                                                                   | 41 (30–58.5)                   | 40 (27–58)             | 0.4895  | 30 (20–38)                                     | 30 (20–40)             | 0.2931  | 62 (54–82)                                     | 61 (51–80)             | 0.4446  |
| COPD duration in categories                                                            |                                |                        |         |                                                |                        |         |                                                |                        |         |
| <5 years                                                                               | 174 (40.3)                     | 577 (42.9)             | 0.1423  | 89 (36.5)                                      | 256 (39.6)             | 0.1587  | 52 (36.6)                                      | 185 (41.6)             | 0.1798  |
| 5 to <10 years                                                                         | 131 (30.3)                     | 412 (30.6)             | .       | 78 (32.0)                                      | 235 (36.3)             | .       | 52 (36.6)                                      | 120 (27.0)             | .       |
| 10 to <15 years                                                                        | 82 (19.0)                      | 195 (14.5)             | .       | 41 (16.8)                                      | 85 (13.1)              | .       | 21 (14.8)                                      | 75 (16.9)              | .       |
| ≥15 years                                                                              | 45 (10.4)                      | 161 (12.0)             | .       | 36 (14.8)                                      | 71 (11.0)              | .       | 17 (12.0)                                      | 65 (14.6)              | .       |
| Exacerbations treated with steroid/antibiotics in the 12 months before screening visit |                                |                        |         |                                                |                        |         |                                                |                        |         |
| 0                                                                                      | 40 (9.3)                       | 89 (6.6)               | 0.0269  | 14 (5.7)                                       | 53 (8.2)               | 0.1979  | 9 (6.3)                                        | 45 (10.1)              | 0.3998  |
| 1                                                                                      | 244 (56.5)                     | 860 (63.9)             | .       | 142 (58.2)                                     | 405 (62.6)             | .       | 83 (58.5)                                      | 258 (58.0)             | .       |
| 2                                                                                      | 95 (22.0)                      | 268 (19.9)             | .       | 62 (25.4)                                      | 132 (20.4)             | .       | 38 (26.8)                                      | 98 (22.0)              | .       |

| Patient characteristics                                                      | Cluster 1<br>Eosinophils >2.4% |                         |         | Cluster 2<br>Eosinophils ≤2.4%, pack-years ≤46 |                         |         | Cluster 3<br>Eosinophils ≤2.4%, pack-years >46 |                         |         |
|------------------------------------------------------------------------------|--------------------------------|-------------------------|---------|------------------------------------------------|-------------------------|---------|------------------------------------------------|-------------------------|---------|
|                                                                              | VI (n=432)                     | FF/VI (n=1345)          | p value | VI (n=244)                                     | FF/VI (n=647)           | p value | VI (n=142)                                     | FF/VI (n=445)           | p value |
| ≥3                                                                           | 53 (12.3)                      | 128 (9.5)               | .       | 26 (10.7)                                      | 57 (8.8)                | .       | 12 (8.5)                                       | 44 (9.9)                | .       |
| Number of hospitalised exacerbations in the 12 months before screening visit |                                |                         |         |                                                |                         |         |                                                |                         |         |
| 0                                                                            | 351 (81.3)                     | 1,077 (80.1)            | 0.6166  | 198 (81.1)                                     | 498 (77.0)              | 0.4043  | 123 (86.6)                                     | 346 (77.8)              | 0.0136  |
| 1                                                                            | 70 (16.2)                      | 221 (16.4)              | .       | 36 (14.8)                                      | 116 (17.9)              | .       | 14 (9.9)                                       | 90 (20.2)               | .       |
| ≥2                                                                           | 11 (2.5)                       | 47 (3.5)                | .       | 10 (4.1)                                       | 33 (5.1)                | .       | 5 (3.5)                                        | 9 (2.0)                 | .       |
| COPD type                                                                    |                                |                         |         |                                                |                         |         |                                                |                         |         |
| Bronchitis                                                                   | 291 (67.4)                     | 875 (65.1)              | 0.3801  | 184 (75.4)                                     | 451 (69.7)              | 0.0934  | 77 (54.2)                                      | 293 (65.8)              | 0.0125  |
| Emphysema                                                                    | 232 (53.7)                     | 799 (59.4)              | 0.0367  | 104 (42.6)                                     | 323 (49.9)              | 0.0518  | 97 (68.3)                                      | 269 (60.4)              | 0.0923  |
| On-treatment pneumonia vaccine                                               | 29 (6.7)                       | 90 (6.7)                | 0.9876  | 27 (11.1)                                      | 48 (7.4)                | 0.0804  | 6 (4.2)                                        | 27 (6.1)                | 0.4067  |
| On-treatment influenza vaccine                                               | 91 (21.1)                      | 323 (24.0)              | 0.2070  | 55 (22.5)                                      | 145 (22.4)              | 0.9670  | 28 (19.7)                                      | 91 (20.4)               | 0.8503  |
| History of:                                                                  |                                |                         |         |                                                |                         |         |                                                |                         |         |
| Cardiovascular disease                                                       | 274 (63.4)                     | 834 (62.0)              | 0.5965  | 137 (56.1)                                     | 382 (59.0)              | 0.4347  | 92 (64.8)                                      | 290 (65.2)              | 0.9341  |
| Cardiac disorders                                                            | 85 (19.7)                      | 221 (16.4)              | 0.1202  | 36 (14.8)                                      | 77 (11.9)               | 0.2538  | 30 (21.1)                                      | 77 (17.3)               | 0.3042  |
| Coronary artery disease                                                      | 45 (10.4)                      | 141 (10.5)              | 0.9686  | 21 (8.6)                                       | 44 (6.8)                | 0.3553  | 20 (14.1)                                      | 53 (11.9)               | 0.4942  |
| Congestive heart failure                                                     | 7 (1.6)                        | 22 (1.6)                | 0.9826  | 4 (1.6)                                        | 15 (2.3)                | 0.5315  | 1 (0.7)                                        | 10 (2.2)                | 0.2378  |
| Myocardial infarction                                                        | 30 (6.9)                       | 74 (5.5)                | 0.2664  | 7 (2.9)                                        | 19 (2.9)                | 0.9573  | 11 (7.7)                                       | 24 (5.4)                | 0.3025  |
| Arrhythmia                                                                   | 27 (6.3)                       | 65 (4.8)                | 0.2474  | 12 (4.9)                                       | 32 (4.9)                | 0.9863  | 6 (4.2)                                        | 20 (4.5)                | 0.8921  |
| Vascular disorders                                                           | 203 (47.0)                     | 644 (47.9)              | 0.7472  | 103 (42.2)                                     | 300 (46.4)              | 0.2665  | 71 (50.0)                                      | 220 (49.4)              | 0.9072  |
| Pneumonia                                                                    | 91 (21.1)                      | 309 (23.0)              | 0.4085  | 51 (20.9)                                      | 137 (21.2)              | 0.9290  | 30 (21.1)                                      | 122 (27.4)              | 0.1363  |
| Eye disorders                                                                | 53 (12.3)                      | 172 (12.8)              | 0.7775  | 20 (8.2)                                       | 67 (10.4)               | 0.3330  | 19 (13.4)                                      | 76 (17.1)               | 0.2975  |
| Metabolism disorders                                                         | 178 (41.2)                     | 551 (41.0)              | 0.9305  | 84 (34.4)                                      | 237 (36.6)              | 0.5411  | 58 (40.8)                                      | 186 (41.8)              | 0.8410  |
| Endocrine disorders                                                          | 0                              | 3 (0.2)                 | 0.3259  | 103 (42.2)                                     | 300 (46.4)              | 0.2665  | 1 (0.7)                                        | 0                       | 0.0764  |
| Baseline WBC, GI/L                                                           | 6.90 (5.80–7.90)               | 7.00 (5.80–8.20)        | 0.3754  | 7.20 (6.10–8.50)                               | 7.30 (6.10–8.60)        | 0.6452  | 7.30 (6.10–8.60)                               | 7.50 (6.20–9.00)        | 0.3785  |
| Baseline lymphocytes, %                                                      | 27.70<br>(22.30–33.20)         | 27.10<br>(22.30–32.90)  | 0.3688  | 26.05<br>(21.20–30.95)                         | 25.80<br>(21.10–31.30)  | 0.9552  | 26.15<br>(20.20–30.30)                         | 24.60<br>(19.40–29.90)  | 0.3287  |
| Baseline eosinophils, GI/L                                                   | 0.27 (0.21–0.39)               | 0.28 (0.21–0.40)        | 0.4070  | 0.11 (0.07–0.14)                               | 0.11 (0.07–0.14)        | 0.3163  | 0.10 (0.07–0.14)                               | 0.11 (0.08–0.15)        | 0.0444  |
| Baseline eosinophils, %                                                      | 4.00 (3.10–5.50)               | 4.10 (3.10–5.60)        | 0.5792  | 1.60 (1.05–2.00)                               | 1.50 (1.00–2.00)        | 0.2928  | 1.40 (1.00–2.00)                               | 1.50 (1.00–2.00)        | 0.0877  |
| Baseline neutrophils, GI/L                                                   | 4.15 (3.39–5.02)               | 4.20 (3.37–5.16)        | 0.3105  | 4.69 (3.83–5.88)                               | 4.84 (3.81–6.01)        | 0.5918  | 4.82 (3.79–5.84)                               | 5.03 (3.90–6.34)        | 0.2992  |
| Baseline neutrophils, %                                                      | 61.00<br>(55.10–66.40)         | 61.10<br>(55.00–66.90)  | 0.2884  | 66.50<br>(60.50–72.20)                         | 66.40<br>(60.80–71.30)  | 0.8773  | 66.60<br>(61.40–73.60)                         | 67.20<br>(62.40–72.50)  | 0.3648  |
| Baseline haemoglobin, G/L                                                    | 145.00<br>(135.0–154.0)        | 145.00<br>(136.0–153.0) | 0.7118  | 145.00<br>(137.0–154.0)                        | 145.00<br>(136.0–154.0) | 0.8750  | 147.00<br>(137.0–157.0)                        | 147.00<br>(138.0–156.0) | 0.9849  |
| Baseline urea/BUN, mmol/L                                                    | 5.50 (4.50–6.80)               | 5.50 (4.50–7.00)        | 0.7234  | 5.20 (4.10–6.80)                               | 5.20 (4.30–6.40)        | 0.7135  | 5.40 (4.50–6.50)                               | 5.50 (4.50–6.60)        | 0.9037  |
| Lung function at screening                                                   |                                |                         |         |                                                |                         |         |                                                |                         |         |
| Pre-bronchodilator FEV <sub>1</sub> , L                                      | 1.09 (0.82–1.37)               | 1.10 (0.81–1.42)        | 0.8555  | 1.07 (0.79–1.42)                               | 1.13 (0.82–1.42)        | 0.5026  | 1.07 (0.74–1.45)                               | 1.02 (0.76–1.38)        | 0.4270  |

| Patient characteristics                            | Cluster 1<br>Eosinophils >2.4% |                        |         | Cluster 2<br>Eosinophils ≤2.4%, pack-years ≤46 |                        |         | Cluster 3<br>Eosinophils ≤2.4%, pack-years >46 |                        |         |
|----------------------------------------------------|--------------------------------|------------------------|---------|------------------------------------------------|------------------------|---------|------------------------------------------------|------------------------|---------|
|                                                    | VI (n=432)                     | FF/VI (n=1345)         | p value | VI (n=244)                                     | FF/VI (n=647)          | p value | VI (n=142)                                     | FF/VI (n=445)          | p value |
| Pre-bronchodilator % predicted FEV <sub>1</sub>    | 39.60<br>(30.50–49.00)         | 39.90<br>(29.85–50.30) | 0.4990  | 41.00<br>(30.90–50.70)                         | 41.80<br>(31.60–51.80) | 0.4433  | 38.60<br>(27.20–51.70)                         | 37.95<br>(28.65–49.75) | 0.5792  |
| Post-bronchodilator FEV <sub>1</sub> , L           | 1.25 (0.99–1.56)               | 1.24 (0.95–1.57)       | 0.8680  | 1.21 (0.92–1.54)                               | 1.23 (0.97–1.55)       | 0.4154  | 1.21 (0.87–1.60)                               | 1.15 (0.90–1.57)       | 0.7544  |
| Post-bronchodilator % predicted FEV <sub>1</sub>   | 46.00<br>(36.10–54.90)         | 45.50<br>(35.30–56.30) | 0.7880  | 45.75<br>(35.10–55.50)                         | 46.60<br>(37.10–56.90) | 0.2969  | 43.75<br>(31.45–56.25)                         | 44.10<br>(32.90–54.65) | 0.8822  |
| Post-bronchodilator FEV <sub>1</sub> /FVC          | 44.35<br>(36.70–52.55)         | 45.40<br>(36.90–54.40) | 0.1415  | 46.30<br>(37.20–55.60)                         | 47.10<br>(37.90–55.30) | 0.7017  | 44.00<br>(33.50–54.05)                         | 42.90<br>(35.70–51.35) | 0.8223  |
| Lung function at baseline                          |                                |                        |         |                                                |                        |         |                                                |                        |         |
| Post-bronchodilator FEV <sub>1</sub> , L           | 1.19 (0.88–1.53)               | 1.16 (0.86–1.53)       | 0.9218  | 1.11 (0.83–1.48)                               | 1.19 (0.90–1.49)       | 0.1669  | 1.11 (0.80–1.53)                               | 1.09 (0.82–1.48)       | 0.7553  |
| Post-bronchodilator % predicted FEV <sub>1</sub>   | 42.50<br>(32.75–53.45)         | 42.80<br>(31.90–54.00) | 0.6827  | 43.35<br>(31.85–51.85)                         | 44.00<br>(34.60–54.30) | 0.2510  | 41.30<br>(29.00–54.90)                         | 41.20<br>(30.00–52.30) | 0.9991  |
| Reversibility at screening                         |                                |                        |         |                                                |                        |         |                                                |                        |         |
| Percent reversibility, %                           | 14.35<br>(6.15–24.20)          | 12.60<br>(4.80–22.90)  | 0.1396  | 11.20<br>(2.70–20.00)                          | 10.80<br>(3.30–19.40)  | 0.9218  | 10.05<br>(3.95–20.15)                          | 13.10<br>(5.60–23.10)  | 0.1047  |
| Reversibility, mL                                  | 150.0<br>(60.0–245.0)          | 130.0<br>(50.00–230.0) | 0.1198  | 120.0<br>(30.0–200.0)                          | 120.0<br>(40.0–200.0)  | 0.8202  | 110.0<br>(50.0–190.0)                          | 130.0<br>(60.0–230.0)  | 0.1065  |
| Reversibility subgroup (≥12% and ≥200 mL increase) | 157 (36.3)                     | 421 (31.3)             | 0.0517  | 62 (25.4)                                      | 162 (25.0)             | 0.9093  | 32 (22.5)                                      | 138 (31.0)             | 0.0525  |
| Medication use                                     |                                |                        |         |                                                |                        |         |                                                |                        |         |
| Drugs used in diabetes                             | 37 (8.6)                       | 147 (10.9)             | 0.1605  | 22 (9.0)                                       | 60 (9.3)               | 0.9057  | 14 (9.9)                                       | 36 (8.1)               | 0.5108  |
| Antithrombotic agents                              | 133 (30.8)                     | 353 (26.2)             | 0.0654  | 51 (20.9)                                      | 127 (19.6)             | 0.6718  | 46 (32.4)                                      | 121 (27.2)             | 0.2315  |
| Antihaemorrhagics                                  | 0                              | 8 (0.6)                | 0.1081  | 0                                              | 2 (0.3)                | 0.3846  | 1 (0.7)                                        | 1 (0.2)                | 0.3932  |
| Anti-anaemic preparations                          | 23 (5.3)                       | 64 (4.8)               | 0.6355  | 12 (4.9)                                       | 23 (3.6)               | 0.3503  | 8 (5.6)                                        | 16 (3.6)               | 0.2855  |
| Cardiac Therapy                                    | 27 (6.3)                       | 90 (6.7)               | 0.7476  | 15 (6.1)                                       | 29 (4.5)               | 0.3063  | 11 (7.7)                                       | 23 (5.2)               | 0.2522  |
| Antihypertensives                                  | 24 (5.6)                       | 63 (4.7)               | 0.4652  | 7 (2.9)                                        | 20 (3.1)               | 0.8629  | 8 (5.6)                                        | 27 (6.1)               | 0.8493  |
| Diuretics                                          | 88 (20.4)                      | 256 (19.0)             | 0.5406  | 53 (21.7)                                      | 137 (21.2)             | 0.8590  | 30 (21.1)                                      | 97 (21.8)              | 0.8657  |
| Peripheral vasodilators                            | 3 (0.7)                        | 17 (1.3)               | 0.3290  | 1 (0.4)                                        | 5 (0.8)                | 0.5547  | 3 (2.1)                                        | 5 (1.1)                | 0.3761  |
| Vasoprotectives                                    | 9 (2.1)                        | 43 (3.2)               | 0.2321  | 7 (2.9)                                        | 16 (2.5)               | 0.7397  | 3 (2.1)                                        | 13 (2.9)               | 0.6064  |
| Beta blocking agents                               | 49 (11.3)                      | 130 (9.7)              | 0.3136  | 24 (9.8)                                       | 52 (8.0)               | 0.3913  | 14 (9.9)                                       | 43 (9.7)               | 0.9452  |
| Calcium channel blockers                           | 64 (14.8)                      | 219 (16.3)             | 0.4683  | 43 (17.6)                                      | 94 (14.5)              | 0.2535  | 20 (14.1)                                      | 65 (14.6)              | 0.8776  |
| Agents acting on the renin–angiotensin system      | 129 (29.9)                     | 415 (30.9)             | 0.6966  | 71 (29.1)                                      | 202 (31.2)             | 0.5399  | 48 (33.8)                                      | 144 (32.4)             | 0.7496  |
| Lipid modifying agents                             | 125 (28.9)                     | 392 (29.1)             | 0.9334  | 51 (20.9)                                      | 136 (21.0)             | 0.9691  | 40 (28.2)                                      | 137 (30.8)             | 0.5540  |
| Anti-inflammatory and antirheumatic products       | 172 (39.8)                     | 471 (35.0)             | 0.0711  | 63 (25.8)                                      | 179 (27.7)             | 0.5805  | 48 (33.8)                                      | 161 (36.2)             | 0.6065  |
| Drugs for treatment of bone disease                | 17 (3.9)                       | 54 (4.0)               | 0.9414  | 15 (6.1)                                       | 26 (4.0)               | 0.1762  | 3 (2.1)                                        | 16 (3.6)               | 0.3847  |
| Psycholeptics                                      | 55 (12.7)                      | 203 (15.1)             | 0.2255  | 31 (12.7)                                      | 79 (12.2)              | 0.8413  | 20 (14.1)                                      | 62 (13.9)              | 0.9637  |

| Patient characteristics         | Cluster 1<br>Eosinophils >2.4% |                |         | Cluster 2<br>Eosinophils ≤2.4%, pack-years ≤46 |               |         | Cluster 3<br>Eosinophils ≤2.4%, pack-years >46 |               |         |
|---------------------------------|--------------------------------|----------------|---------|------------------------------------------------|---------------|---------|------------------------------------------------|---------------|---------|
|                                 | VI (n=432)                     | FF/VI (n=1345) | p value | VI (n=244)                                     | FF/VI (n=647) | p value | VI (n=142)                                     | FF/VI (n=445) | p value |
| Psychoanaleptics                | 66 (15.3)                      | 224 (16.7)     | 0.5006  | 31 (12.7)                                      | 84 (13.0)     | 0.9121  | 22 (15.5)                                      | 72 (16.2)     | 0.8459  |
| Antihistamines for systemic use | 45 (10.4)                      | 171 (12.7)     | 0.2037  | 14 (5.7)                                       | 59 (9.1)      | 0.1008  | 12 (8.5)                                       | 42 (9.4)      | 0.7230  |

Data are number (%) or median (intra-quartile range) unless otherwise stated.

BUN, blood urea nitrogen; COPD, chronic obstructive pulmonary disease; FEV<sub>1</sub>, forced expiratory volume in 1 second; FF, fluticasone furoate; FVC, forced vital capacity; VI, vilanterol; WBC, white blood cells.
